# Supplementary material for: Diversity and distribution of the caddisfly genus Atopsyche Banks, 1905 in Ecuador, with the description of seven new species (Trichoptera: Hydrobiosidae)
Source: PeerJ. 2025 Apr 14;13:e18769. doi: 10.7717/peerj.18769 (PMC12005178; doi:10.7717/peerj.18769)
Supplement: Table S1 — From the University of Minnesota Insect Collection Specify database. [file peerj-13-18769-s001.xlsx]

## Sheet: Supplementary table
Province	Azuay						Bolivar			Carchi							Cotopaxi				El Oro	Imbabura				Loja		Manabi	Morona Santiago								Napo
Locality	Río Angas, between Angas & Soldados	Río Chacayacu ca. 1.5 km W La Iberia	Río Chaucha & waterfall 1.2 km E La Iberia	Río Chaucha between La Iberia and Chaucha	Río el Chorro, El Chorro del Girón	trib. to Río Chaucha in San Antonio de Chaucha	Quebrada San Pablo, N of Chazojuan	Río Puracachi, 2 km (air) NW Salinas de Guaranda	trib. Río Soloma between Camarón and Chazojuan	near hacienda Primavera, Río Hualchancito	near Hacienda Primavera, trib. to Río Hualchancito	near Lita, small stream	Quebrada San Francisco (Hacienda San Francisco) ca. 1.8 km W Las Juntas	Río Blanco between El Goaltal and Las Juntas	Río Chilmá in Chilmá Bajo	Río Mira at Rocafuerte	Recinto Los Laureles (Jardín de los Suenos) "blue" trail stream	Recinto Los Laureles (Jardín de los Suenos) "green" trail stream	Recinto Los Laureles (Jardín de los Suenos) "red" trail stream	Recinto Los Laureles (Jardín de los Suenos) stream	Reserva Buenaventura, small stream on Umbrellabird Trail	Reserva Los Cedros, Rio de la Plata	Reserva Los Cedros, Rio Los Cedros	Reserva Los Cedros, small stream nr. station	Reserva Los Cedros, tributary to Rio Los Cedros	Cerro de Arcos, Quebrada Huatihuiña	Cerro de Arcos, small trib. to Quebrada Huatihuiña	Reserva Ecológica Jama-Coaque, Río Camarones	Río San Antonio, between Limón Indanza & San Antonio	Río Seipa, balneario, Sucúa	trib. to Río San Antonio, between Limón Indanza & San Antonio	Macas, small gravel stream (Wallace/Real property)	Macas; Río Upano	Río Salado, Highway E46 (via Riobamba-Macas)	Santa Rosa, Finca Upano, small lagoon, Río Upano system (pan trap 2)	trib. to Río Abanico; Highway E46 (via Riobamba-Macas)	Parque Nacional Cayambe-Coca, jct. Río Papallacta & Río Guango	Parque Nacional Cayambe-Coca, Quebrada Piburja	Parque Nacional Cayambe-Coca, Río Papallacta, above Termas Papallacta	Parque Nacional Cayambe-Coca, Río Papallacta, Guango Lodge	Parque Nacional Cayambe-Coca, trib. to Río Papallacta, E of Papallacta	Reserva Ecológica Cayambe-Coca, Río Canoa, rd. to Oyacachi	Río Aliso, SW of Cosanga	Río Chontas, Tamiaju SW of Cosanga	Río Lupi at Estabio de Tómas Lodge	San Isidro Lodge, small stream	San Isidro, stream on trail near Yanayacu Biological Station	Sierra Azul trib. (Rojo) to Río Colorado	trib. to Río Cosanga, between San Isidro & Sierra Azul, off main road
Elevation	3645	545	700	1145	2500	1831	1150	3615	605	1200	1200	967	1241	1258	2300	770	447	497	505	392	570	1587	1312	1460	1312	3308	3304	610	921	719	1016	1076	1070	1646	1067	1531	2687	3300	3386	2680	2734	3667	2227	1982	551	2091	2076	2219	2268
Latitude	-2.88741	-2.8907	-2.89407	-2.91378	-3.12945	-2.90736	-1.37978	-1.39328	-1.40112	0.80279	0.81207	0.812725	0.8033	0.80433	0.85452	0.804593	-0.83484	-0.83533	-0.83167	-0.8383	-3.65326	0.32495	0.30359	0.31127	0.30374	-3.56521	-3.56473	-0.1161	-3.00824	-2.47897	-2.99616	-2.20299	-2.20934	-2.24253	-2.20572	-2.24985	-0.37713	-0.21242	-0.35364	-0.37953	-0.37065	-0.28701	-0.62941	-0.58994	-0.97653	-0.58916	-0.6015	-0.673921	-0.61079
Longitude	-79.3165	-79.5282	-79.5079	-79.4582	-79.166	-79.4137	-79.155	-79.0357	-79.1928	-78.2182	-78.2929	-78.2906	-78.1708	-78.1697	-78.0311	-78.1395	-79.2095	-79.2081	-79.207	-79.2123	-79.7633	-78.7808	-78.7823	-78.7815	-78.7823	-79.4324	-79.433	-80.1245	-78.4299	-78.1267	-78.4316	-78.0854	-78.0883	-78.2779	-78.0855	-78.2024	-78.0749	-78.0778	-78.1512	-78.0744	-78.0805	-78.1153	-77.9106	-77.8558	-77.8583	-77.8802	-77.8836	-77.9174	-77.8949
Species
A. andina sp nov.								19																															19
A. azuayana sp nov.	4
A. bravoi Gomes & Calor, 2019																																							1
A. cajas Harper & Turcotte, 1985																										7	1
A. callosa (Navás) 1924		3	1						2	6	2	15	1	5						7	10								8			3	2
A. chocoandina sp nov.
A. copayapu Schmid, 1989
A. davidsoni Sykora, 1991																																							3
A. incatupac Schmid 1989					3	1	1																1
A. jocotoco sp nov.
A. kingi Ross 1953													3
A. lobosa Ross and King 1952
A. maitacapac Schmid, 1989
A. mayucopac Schmid 1989																																														1
A. neolobosa Flint, 1963					2																																			3
A. neotropicalis Schmid, 1989
A. onorei Sykora, 1999
A. pachacutec Schmid 1989																							2	4
A. papallacta sp nov.																																						1	27
A. piburja sp nov.																																						1
A. puharcocha Schmid, 1989																								2																			65	25		2			14
A. rawlinsi Sykora, 1991																																							1
A. sinchicurac Schmid, 1989
A. tampurimac Schmid, 1989																																															1
A. tapichalaca sp nov.
A. tlaloc Schmid, 1989
A. vatucra Ross 1953																																2
A. youngi Sykora, 1991
Unidentified Females		1		2						2		3		35	2	3	5	2	1		13	3	4		9	1		2	4	20	2	4		3	2	1	2		1	1	2	2	12	6	2			3	1
[truncated: 70 more columns]
